# Supplementary material for: Protein engineering in the big data era: harnessing near-redundant structural data
Source: Research Square preprint supplement (doi:10.21203/rs.3.rs-129805/v1), 2020-12-16

Supplementary Table ST1

Root Mean Square Error (RMSE) grouped by primary (author-provided) PDB ID. When homologs are available (column #4 greater than unity), RMSE usually decreases (column 3 lower than column 2).

| Primary PDB ID | RMSE (kcal/mol) Using single structure | RMSE (kcal/mol) Using multiple structures | Number of homologs | Number of primary mutants |
|----------------|----------------------------------------|-------------------------------------------|--------------------|---------------------------|
| 1A22           | 0.84                                   | 0.67                                      | 4                  | 142                       |
| 1A4Y           | 1.49                                   | 1.49                                      | 1                  | 45                        |
| 1ACB           | 2.13                                   | 2.13                                      | 1                  | 6                         |
| 1AHW           | 1.23                                   | 1.23                                      | 1                  | 10                        |
| 1AK4           | 2.43                                   | 2.43                                      | 1                  | 15                        |
| 1CBW           | 1.03                                   | 0.96                                      | 2                  | 15                        |
| 1CSE           | 1.71                                   | 1.59                                      | 2                  | 6                         |
| 1DAN           | 0.86                                   | 0.78                                      | 2                  | 118                       |
| 1DQJ           | 2.23                                   | 2.21                                      | 10                 | 34                        |
| 1DVF           | 2.07                                   | 2.07                                      | 1                  | 35                        |
| 1E96           | 1.15                                   | 1.15                                      | 1                  | 6                         |
| 1EAW           | 0.86                                   | 0.86                                      | 1                  | 27                        |
| 1EMV           | 1.18                                   | 1.24                                      | 13                 | 51                        |
| 1F47           | 0.87                                   | 0.87                                      | 1                  | 12                        |
| 1FC2           | 1.62                                   | 1.62                                      | 1                  | 9                         |
| 1FCC           | 1.99                                   | 1.99                                      | 1                  | 8                         |
| 1FR2           | 3.17                                   | 3.17                                      | 1                  | 1                         |
| 1GC1           | 0.67                                   | 0.59                                      | 3                  | 56                        |
| 1HE8           | 1.01                                   | 1.01                                      | 1                  | 10                        |
| 1IAR           | 1.26                                   | 0.97                                      | 3                  | 36                        |
| 1JCK           | 1.52                                   | 1.52                                      | 1                  | 7                         |
| 1JRH           | 1.62                                   | 1.62                                      | 1                  | 53                        |
| 1JTG           | 2.73                                   | 2.29                                      | 5                  | 118                       |
| 1KAC           | 1.90                                   | 1.45                                      | 2                  | 2                         |
| 1KIP           | 0.63                                   | 0.63                                      | 1                  | 1                         |
| 1KIQ           | 3.98                                   | 3.98                                      | 1                  | 1                         |
| 1KIR           | 1.15                                   | 1.15                                      | 1                  | 1                         |
| 1KTZ           | 1.15                                   | 1.15                                      | 1                  | 27                        |
| 1LFD           | 0.85                                   | 0.85                                      | 1                  | 25                        |
| 1MLC           | 0.97                                   | 1.01                                      | 2                  | 11                        |
| 1NCA           | 0.84                                   | 0.86                                      | 4                  | 4                         |
| 1NMB           | 2.12                                   | 1.86                                      | 3                  | 6                         |

|      |      |      |    |    |
|------|------|------|----|----|
| 1P69 | 0.42 | 0.42 | 1  | 1  |
| 1P6A | 3.76 | 3.76 | 1  | 1  |
| 1REW | 1.29 | 1.27 | 3  | 24 |
| 1S1Q | 1.02 | 1.02 | 1  | 6  |
| 1TM1 | 1.69 | 1.64 | 18 | 21 |
| 1UUZ | 1.09 | 1.09 | 1  | 5  |
| 1VFB | 1.15 | 1.03 | 9  | 42 |
| 1XD3 | 1.03 | 1.03 | 1  | 18 |
| 1Z7X | 1.33 | 1.36 | 2  | 21 |
| 2A9K | 0.92 | 0.92 | 2  | 1  |
| 2B42 | 0.69 | 0.69 | 1  | 3  |
| 2GYK | 4.67 | 4.67 | 2  | 1  |
| 2I26 | 0.59 | 0.59 | 1  | 2  |
| 2I9B | 0.47 | 0.47 | 4  | 5  |
| 2J12 | 0.95 | 0.95 | 1  | 1  |
| 2J1K | 1.09 | 1.09 | 1  | 3  |
| 2JEL | 1.44 | 1.44 | 1  | 43 |
| 2OOB | 0.72 | 0.72 | 1  | 4  |
| 2PCB | 1.17 | 0.90 | 3  | 6  |
| 2PCC | 1.76 | 2.03 | 17 | 12 |
| 2QJ9 | 1.37 | 0.79 | 2  | 3  |
| 2QJA | 1.06 | 1.19 | 2  | 3  |
| 2QJB | 1.40 | 1.40 | 1  | 3  |
| 2VLJ | 1.00 | 1.00 | 1  | 14 |
| 2VLN | 1.82 | 1.82 | 1  | 1  |
| 2VLO | 0.97 | 0.97 | 1  | 1  |
| 2VLP | 0.76 | 0.76 | 1  | 1  |
| 2VLQ | 1.03 | 1.03 | 1  | 1  |
| 2VLR | 0.19 | 0.19 | 1  | 1  |
| 2WPT | 1.85 | 1.85 | 1  | 32 |
| 3BK3 | 1.48 | 1.48 | 1  | 13 |
| 3BN9 | 0.65 | 0.65 | 1  | 25 |
| 3NPS | 0.88 | 0.88 | 1  | 27 |

Supplementary Figure SF 1: Root Mean Square Error (RMSE) decreases as number of homologs increases from 1 to 4. From 5 homologs onwards RMSE becomes higher and more variable. There is only one protein type (homologs of 1JTG) that has 5 homologs; the same goes for 9,10,13,17, and 18 homologs. 1DQJ (10 homologs) includes an antibody; since there are so many antibodies in the PDB of similar structure it is easy to get spurious matches.

Also the number of mutants decreases and experimental data sources become less diverse.

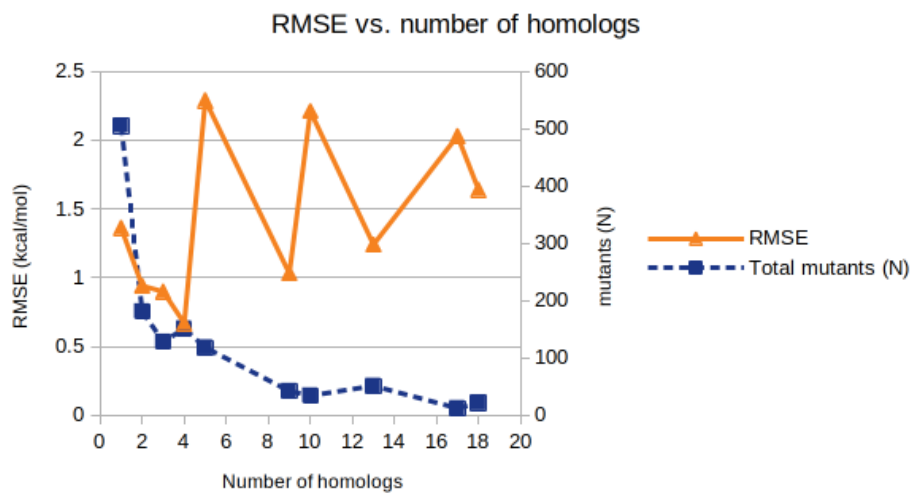

Supplement: Supplementary file 1 [file 0a08e65fbed0aabe334fc8ea.pdf]
